# Supplementary material
Source: publisher site journal article supplement (https://www.spandidos-publications.com/2784/downloadSupplementary)

Figure S1. Quantitative analysis of p62 and LC3I of western blotting. \*\*P<0.01 and \*\*\*P<0.001. LC3, microtubule-associated protein 1 light chain 3.

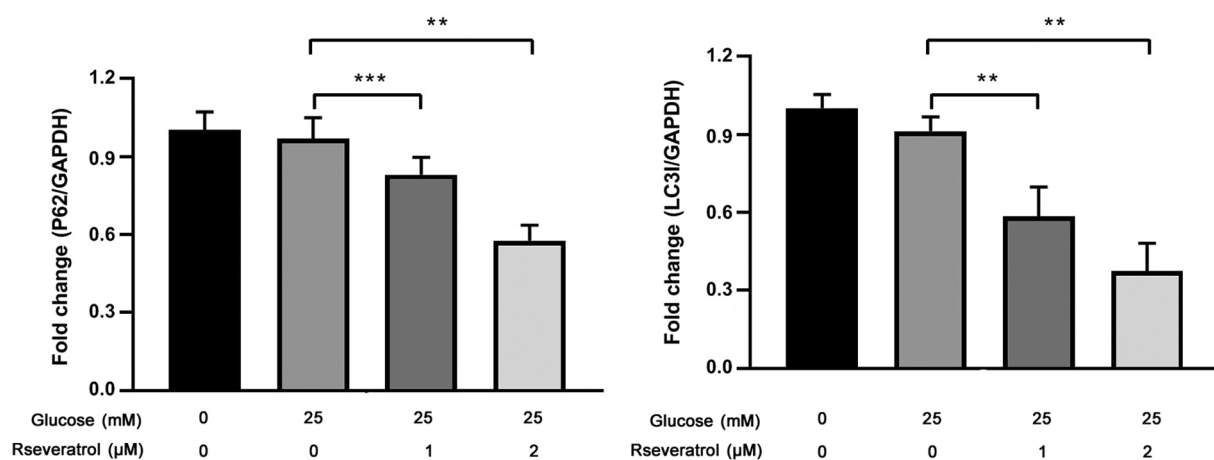

Supplement: Supplementary file 1 [file downloadSupplementary]
